# Supplementary material
Source: publisher figshare collection journal article supplement (https://tandf.figshare.com/articles/dataset/_/5732289)

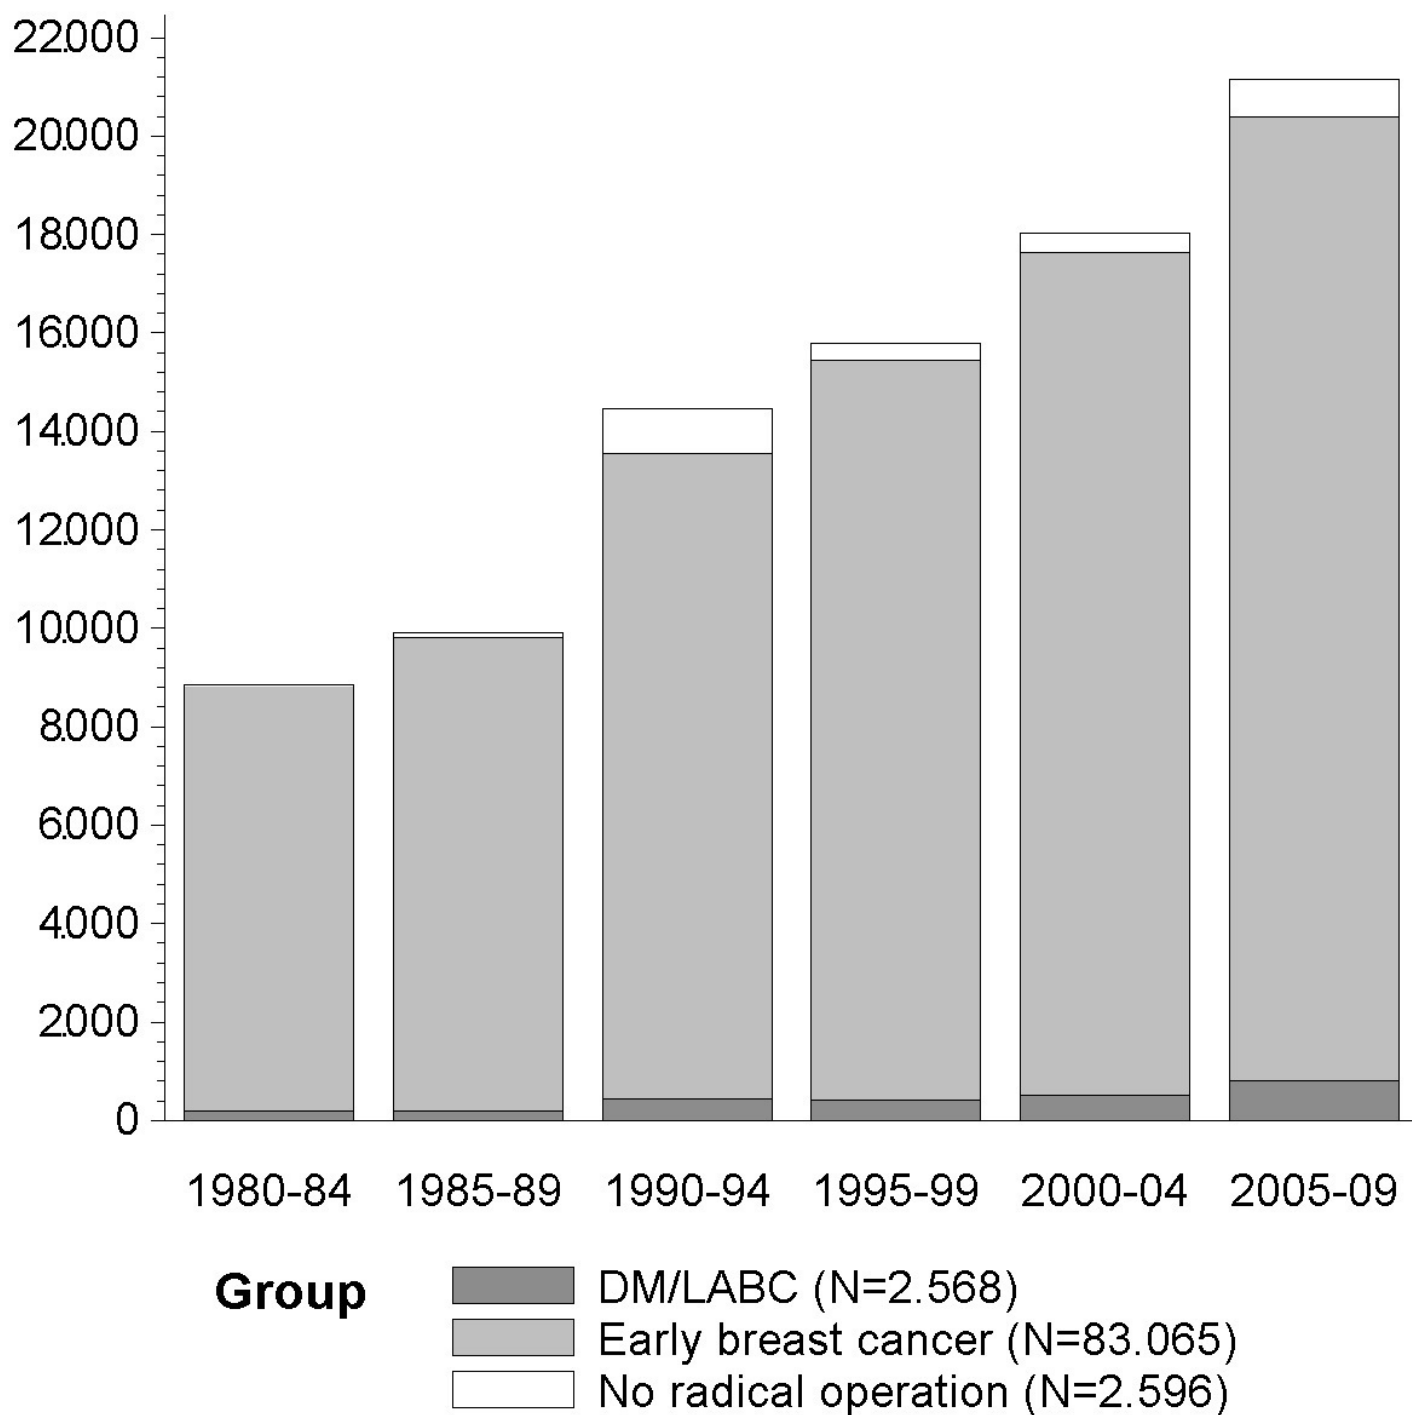

Supplement: Supplementary file 1 [file 1]

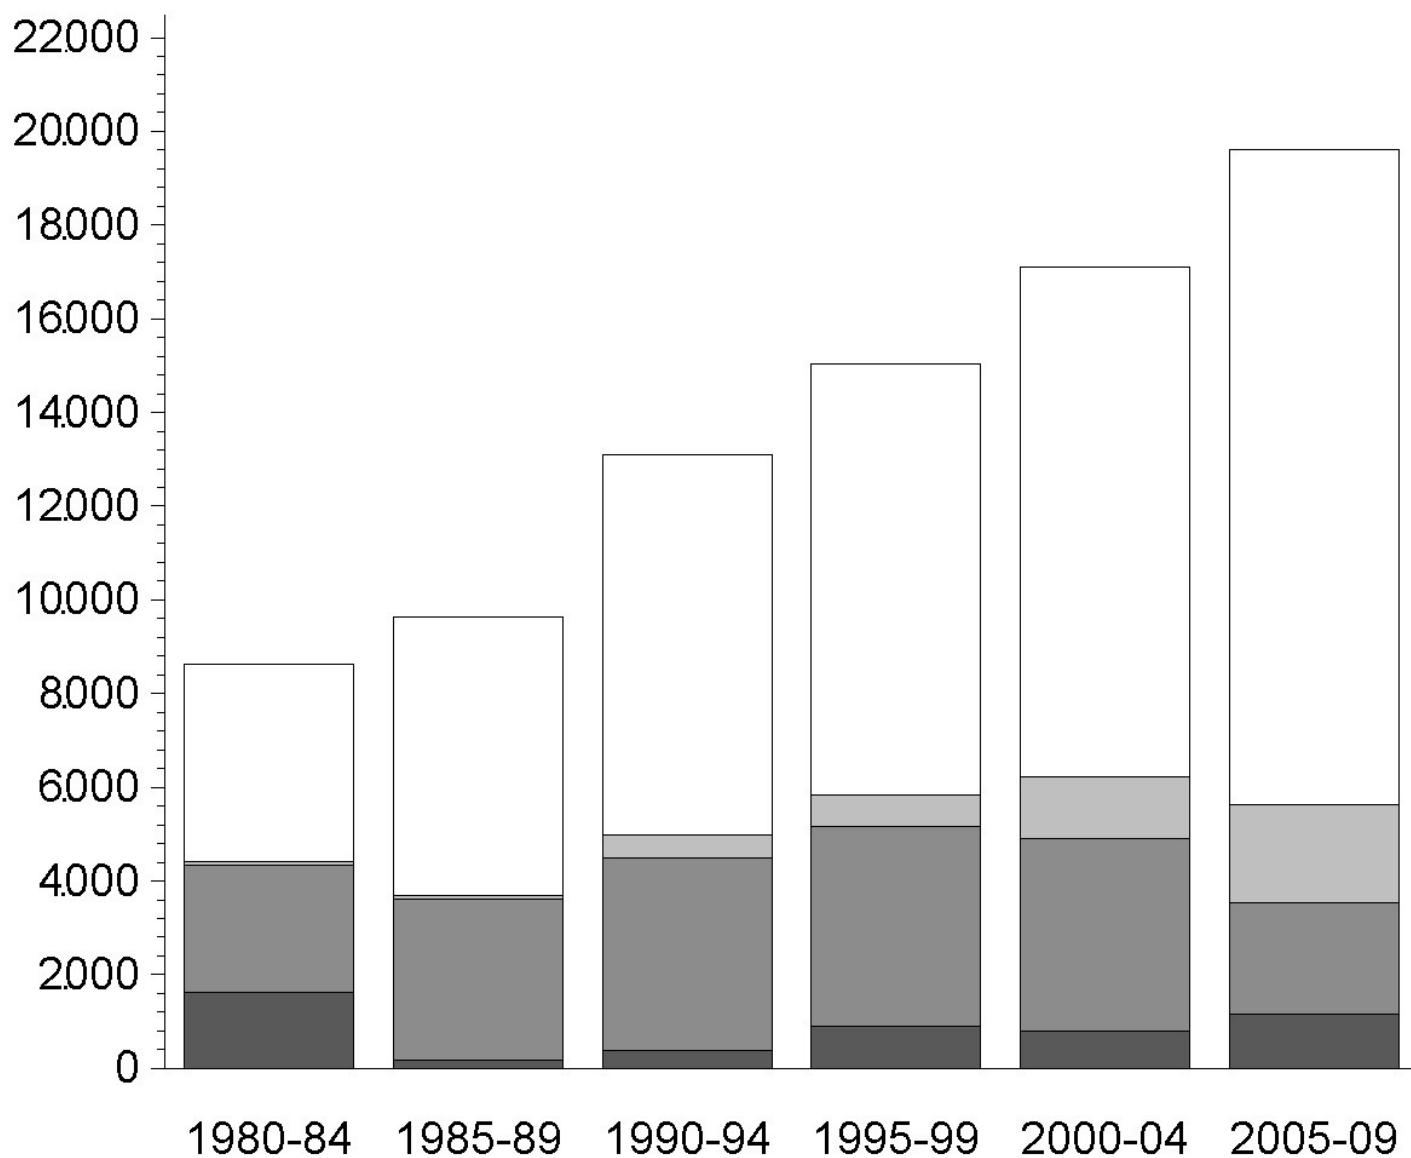

**Group**

- Follow-up relevance unknown (N=5.034)
- No follow-up (N=20.964)
- No relevant follow-up (N=4.699)
- Relevant follow-up (N=52.368)

Supplement: Supplementary file 2 [file 1]

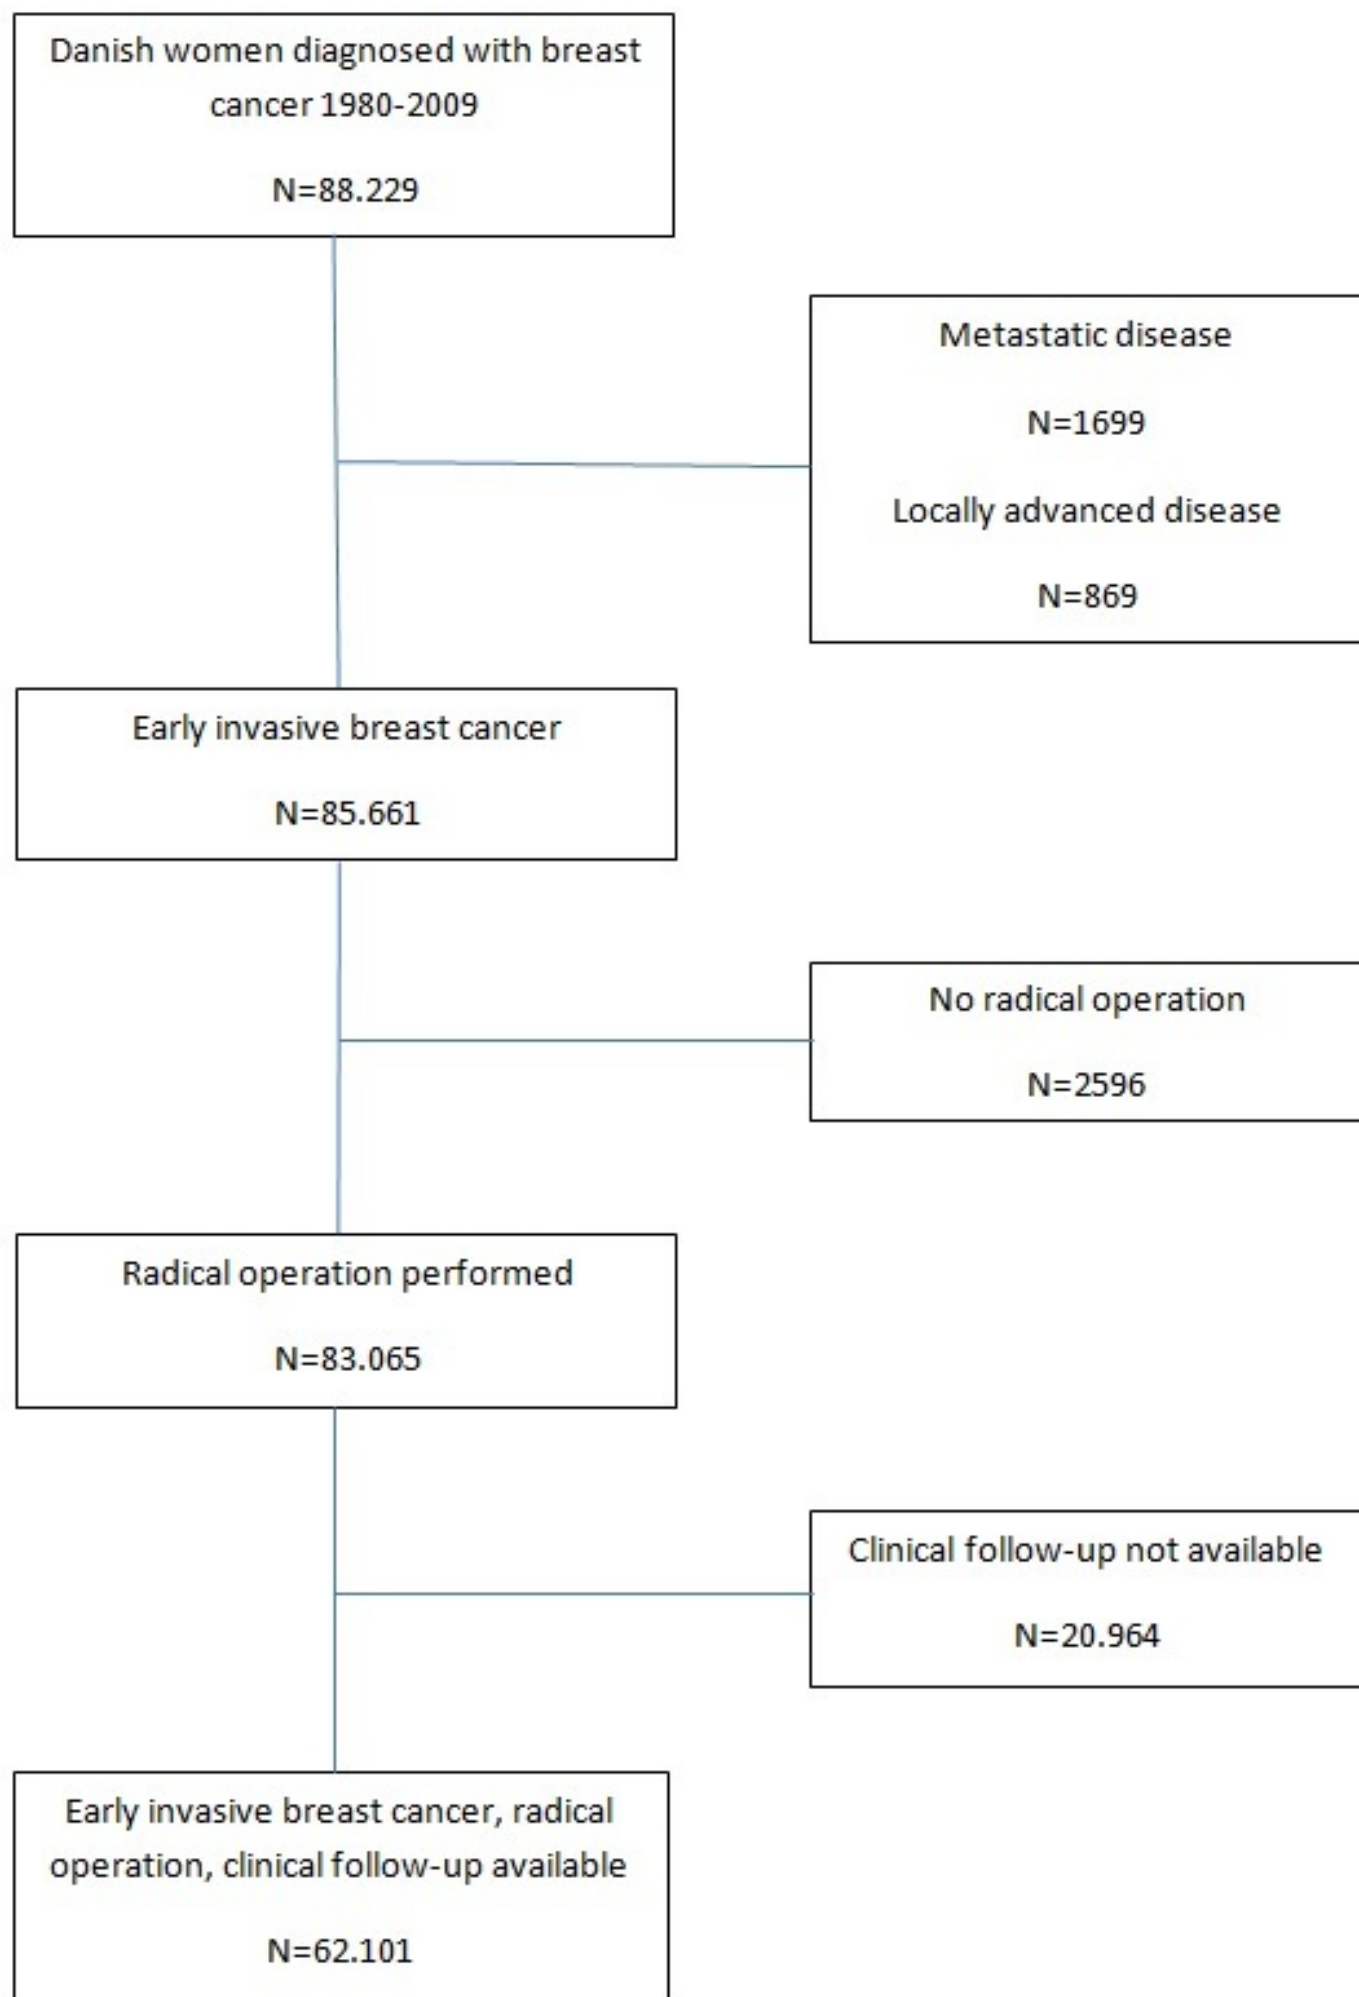

Supplement: Supplementary file 3 [file 1]
